# Supplementary material
Source: HighWire-hosted journal article supplement (https://gut.bmj.com/content/68/5/804)
Supplement: inline-supplementary-material-1 [file inline-supplementary-material-1.pdf]

## SUPPLEMENTAL MATERIALS

### Methods – Search Strategy

#### Supplemental Figure 1A – Ovid Medline Search Strategy

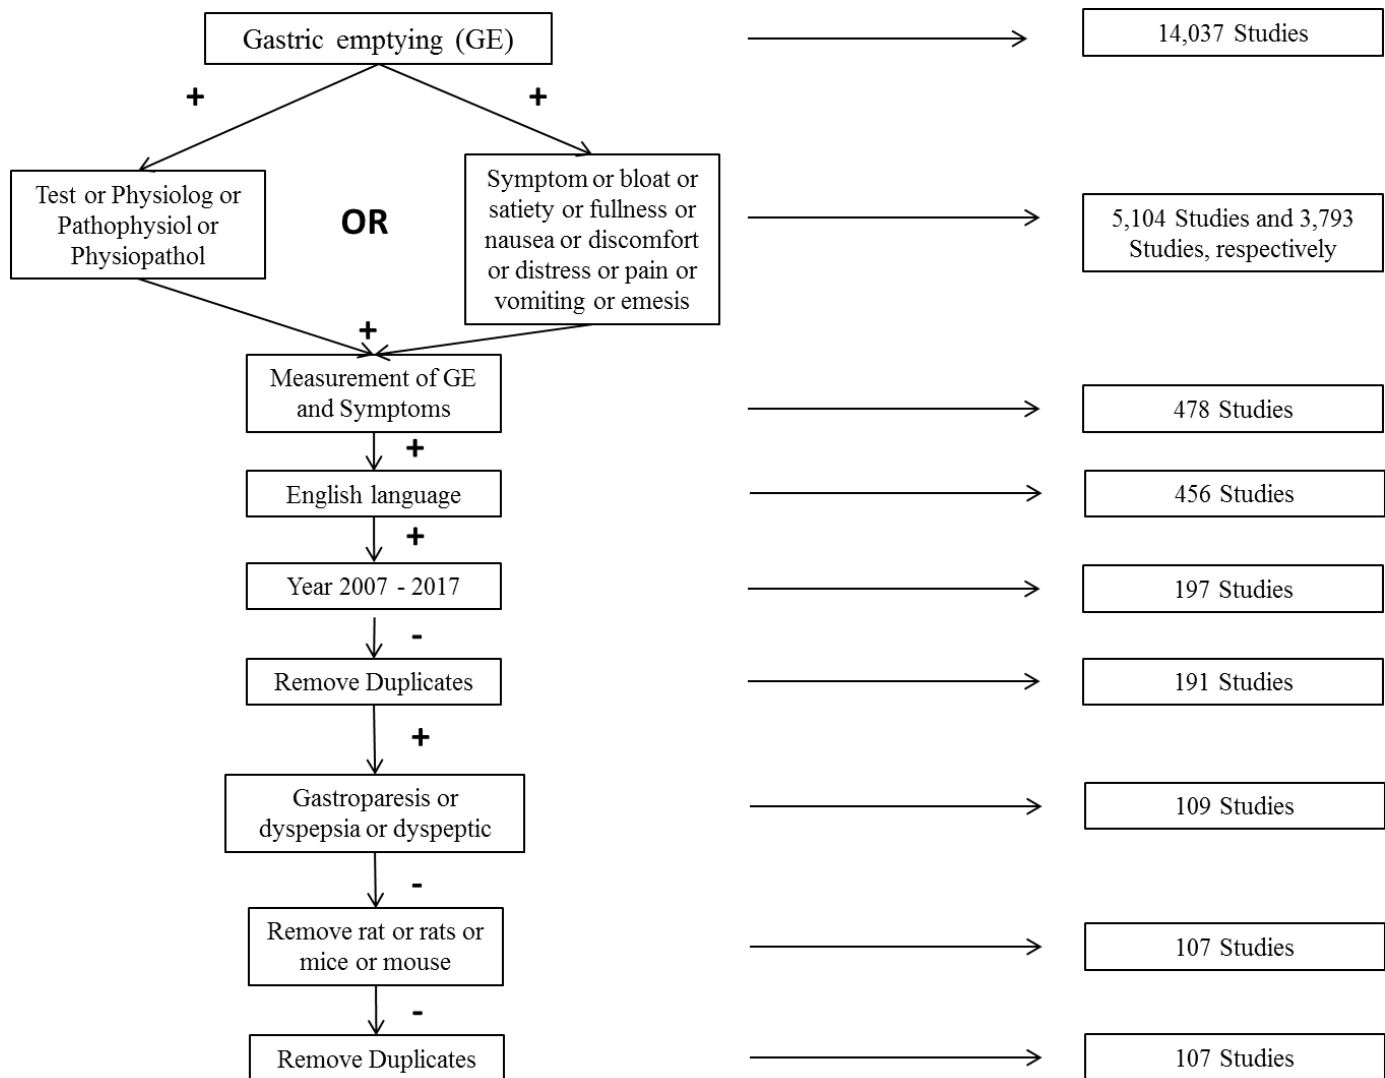

# Supplemental Figure 1B – Embase Search Strategy

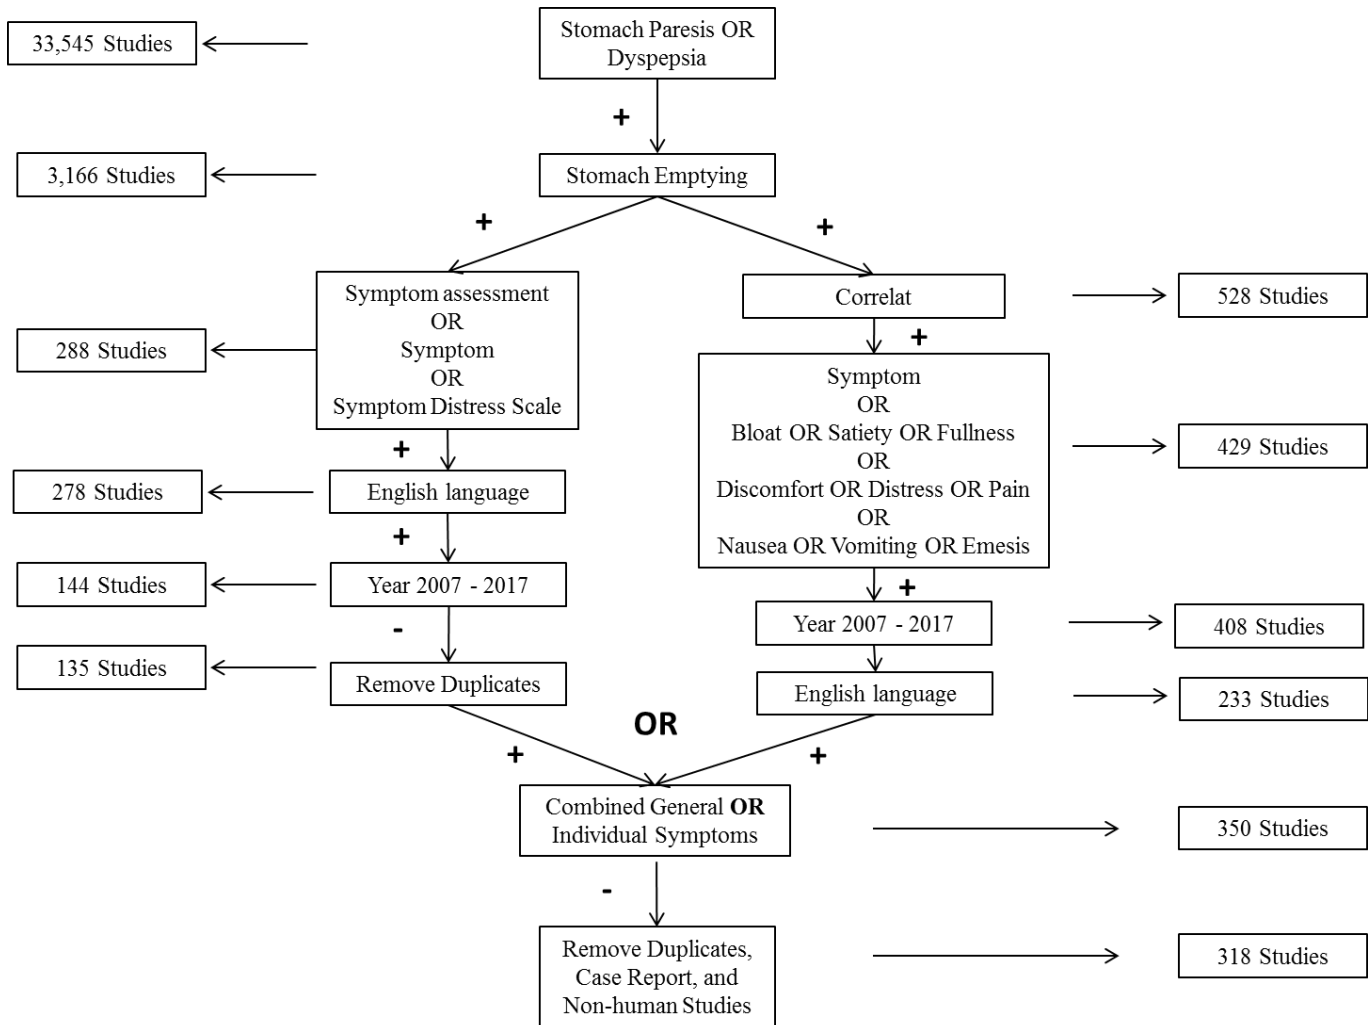

### **Newcastle Ottawa Scoring for Each Study within the Meta-analysis**

Note: A study can be awarded a maximum of one star for each numbered item within the selection and outcome categories. A maximum of two stars can be given for comparability

#### **Selection**

- 1) Representativeness of the exposed cohort
  - a) Truly representative of the average person who presents with chronic UGI Sx in the community \*
  - b) Somewhat representative of the average person who presents with chronic UGI Sx in the community \*
  - c) Selected group of users, e.g. nurses, volunteers
  - d) No description of the derivation of the cohort
- 2) Selection of the non-exposed cohort
  - a) Drawn from the same community as the exposed cohort \*
  - b) Drawn from a different source
  - c) No description of the derivation of the non-exposed cohort
- 3) Ascertainment of exposure
  - a) Secure record (eg surgical records) \*
  - b) Structured interview \*
  - c) Written self-report
  - d) No description
- 4) Demonstration that outcome of interest was not present at start of study
  - a) Yes \*
  - b) No

#### **Comparability**

- 1) Comparability of cohorts on the basis of the design or analysis
  - a) Study follows optimal GE methodology \*
  - b) Study follows suboptimal GE methodology

#### **Outcome**

- 1) Assessment of outcome
  - a) Independent blind assessment \*
  - b) Record linkage \*
  - c) Self-report
  - d) No description
- 2) Was follow-up long enough for outcomes to occur
  - a) Yes, adequate number with delayed GE \*
  - b) No
- 3) Adequacy of follow up of cohorts
  - a) Complete follow up - all subjects accounted for \*

- b) Subjects lost to follow up unlikely to introduce bias; small number lost, >90% follow up\*
- c) Follow up rate <89% and no description of those lost
- d) No statement

## Supplemental Results

### Nausea

There was a total of 16 studies which evaluated and identified a significant association between gastric emptying and nausea.

#### *Analysis according to covariates*

##### *a. Gastric emptying methodology*

(i) *Optimal methodology*: There was a significant association with similar magnitude of association to that observed when all 16 studies are assessed.

(ii) *Suboptimal methodology*: There was no significant association found. Meta-regression demonstrated significant difference between optimal and suboptimal gastric emptying test methodology.

##### *b. Gastric emptying type*

(i) *Breath test*: The entire complement of breath test gastric emptying studies demonstrated no significant association between nausea and delayed gastric emptying, but when only studies with optimal breath test methodology were considered, there was a significant association.

(ii) *Scintigraphy*: All scintigraphy studies and those with optimal scintigraphy methodology demonstrated a significant association.

##### *c. Patient subgroups:*

(i) *UGI Sx*: There was a significant association in all studies and those with optimal gastric emptying test methodology.

(ii) *Diabetes*: There was no significant association in either all studies or those with optimal gastric emptying test methodology.

(iii) *Gastroparesis*: There was a significant association in all studies and those with optimal gastric emptying test methodology with similar magnitude of association in both groups.

d. *Heterogeneity*: The  $I^2$  throughout all analyses was small except for all breath tests. The heterogeneity improved to 0% in all studies with optimal gastric emptying test methodology.

### **Vomiting**

A total of 13 studies evaluated the association between gastric emptying and vomiting, and demonstrated a significant association.

#### ***Analysis according to covariates***

##### ***a. Gastric emptying test methodology***

(i) *Optimal methodology*: There was a significant association with higher OR compared to the association observed with the entire complement of studies.

(ii) *Suboptimal methodology*: There was no significant association. Meta-regression demonstrated a significant difference between associations noted for the studies using optimal and suboptimal gastric emptying test methods.

##### ***b. Gastric emptying type***

(i) *Breath test*: There was no association found among all breath test studies and studies with optimal breath test methodology. There were only 2 studies that utilized optimal gastric emptying breath test.

(ii) *Scintigraphy*: There was a significant association in all scintigraphy studies and studies with optimal scintigraphy test methodology. Meta-regression demonstrated a significant

difference between breath test and scintigraphy but no significant difference between studies with optimally conducted breath test and scintigraphy studies.

*c. Patient subgroups:*

(i) *UGI Sx*: All studies and studies with optimal gastric emptying test methodology demonstrated a significant association. There was an increase in the magnitude of association in studies with optimal gastric emptying test methodology.

(ii) *Diabetes*: There was no association in either all studies or those with optimal gastric emptying test methodology. However, there were only 4 and 2 studies, respectively.

(iii) *Gastroparesis*: There was a significant association, but there was only one study with optimal gastric emptying in this patient population, precluding evaluation for meta-analysis.

*d. Heterogeneity*: The I<sup>2</sup> was elevated at 63% for all studies, but improved to 14% after evaluation studies with optimal gastric emptying test methodology. A similar improvement in heterogeneity was seen across covariates after evaluating studies with optimal gastric emptying test methodology except for breath tests and patients with UGI Sx, which has only 2 studies in each group.

## **Abdominal Pain**

There was a significant association noted in all 16 studies that evaluated abdominal pain and gastric emptying.

### ***Analysis according to covariates***

*a. Gastric emptying test methodology*

(i) *Optimal methodology*: There was a significant association of similar magnitude seen in all gastric emptying studies.

(ii) *Suboptimal methodology*: There was no association.

*b. Gastric emptying type:*

(i) *Breath test*: There was no association among all studies, but there was a significant association with an increase in the magnitude of association in studies with optimal breath test methodology (OR 5.0, 95% CI 1.1-22.6). There were only 2 studies with optimal breath test methodology.

(ii) *Scintigraphy*: There was no association in all studies with scintigraphy and studies with optimal scintigraphy test methodology.

*c. Patient subgroups*

(i) *UGI Sx*: There was no association found in all studies. However, there was a significant association seen in patients with optimal gastric emptying test methodology.

(ii) *Diabetes*: There was no association seen in all studies or studies with optimal gastric emptying test methodology. There were only 3 and 2 studies in each group, respectively.

(iii) *Gastroparesis*: There was no association in all gastric emptying studies. There were only 3 studies in this group, and 1 study with optimal gastric emptying test methodology.

*d. Heterogeneity*: There was moderate heterogeneity throughout the studies which evaluated abdominal pain. There was little improvement after isolating studies with optimal gastric emptying test methodology, except for patients with UGI Sx.

**Bloating**

Analysis of the entire complement (n=15) studies demonstrated a significant association between bloating and gastric emptying.

***Analysis according to covariates***

*a. Gastric emptying test methodology*

(i) *Optimal methodology*: There was a significant association.

(ii) *Suboptimal methodology*: There was no significant association. Meta-regression did not demonstrate a significant difference between studies with optimal and suboptimal gastric emptying test methodology.

*b. Gastric emptying type*

(i) *Breath test*: There was no association in all studies with breath test, but a significant association with an increase in magnitude (OR 3.7, 95% CI 1.4-9.8) was found in studies with optimal breath test methodology. There were only 3 studies with optimal breath test methodology.

(ii) *Scintigraphy*: Though there was an association seen in all scintigraphy studies, there was no association noted in studies with optimal scintigraphy methodology.

*c. Patient subgroups*

(i) *UGI Sx*: There was an association, which lost significance after analyzing studies with optimal gastric emptying test methodology.

(ii) *Diabetes*: There was no significant association in all studies and studies with optimal gastric emptying test methodology.

(iii) *Gastroparesis*: There was no association in patients with gastroparesis. There was only one study with optimal gastric emptying test methodology.

*d. Heterogeneity*: There was moderate to high heterogeneity throughout the studies with no significant improvement after evaluating all covariates.

**Early Satiety/ Fullness**

There was an overall significant association seen in all studies that evaluated early satiety/fullness.

***Analysis according to covariates***



*a. Gastric emptying test methodology*

(i) *Optimal methodology*: There was a significant association with similar magnitude seen in all studies.

(ii) *Suboptimal methodology*: There was a significant association with similar magnitude seen in all studies.

*b. Gastric emptying type*

(i) *Breath test*: There was a significant association.

(ii) *Scintigraphy*: There continued to be a significant association with a similar magnitude of association seen in breath test and in all studies.

*c. Patient subgroups:*

(i) *UGI Sx*: There was significant association that remained after evaluating optimal gastric emptying test methodology.

(ii) *Diabetes*: Similar to studies that evaluated UGI Sx, there was a significant association between all studies and studies that utilized optimal gastric emptying test methodology.

(iii) *Gastroparesis*: There was no significant association, and there was only 1 study with optimal gastric emptying test methodology, preventing meta-analysis calculation.

*d. Heterogeneity*: There was moderate heterogeneity seen in all studies, with improvement to low heterogeneity in breath test studies and patients with diabetes and gastroparesis. There was no significant improvement when evaluating studies with optimal gastric emptying test methodology.

**Composite symptoms**

Analysis of the entire complement of studies (n=9) demonstrated a significant association between composite symptoms and gastric emptying, OR 2.8, 95% CI 1.5-5.2.

***Analysis according to covariates***

*e. Gastric emptying test methodology*

(i) *Optimal methodology*: There was no significant association.

(ii) *Suboptimal methodology*: There continued to be a significant association to a similar degree as seen after evaluating the association in all studies.

*f. Gastric emptying type*

(i) *Breath test*: There was a significant association. Because there was only one study with optimal breath test methodology, no meta-analysis could be completed.

(ii) *Scintigraphy*: There was a significant association, but didn't continue after evaluating studies with optimal scintigraphy methodology. There were only 2 studies with optimal scintigraphy methodology.

*g. Patient subgroups*

(i) *UGI Sx*: There was a significant association. There was only 1 study with optimal gastric emptying test methodology.

(ii) *Diabetes*: There was no significant association. No further assessment could be completed with studies with optimal gastric emptying test methodology because there was only 1 study within this category.

(iii) *Gastroparesis*: There were no studies that enrolled gastroparesis.

*h. Heterogeneity*: There was moderate heterogeneity among all studies that did not significantly change after analysis of covariates.

**Supplemental Table 1. Breath test studies in patients with or without gastroparesis and relationship with symptoms of nausea (N), vomiting (V), fullness (F), early satiety (ES) and abdominal pain (AP): [OR = odds ratio (95% confidence interval, CI); CS: cross-sectional; DM=diabetes; ESRD on HD: end stage renal disease on hemodialysis; FD= functional dyspepsia; GLY= glycine; OCT: octanoate; P= prospective; PADYQ: Porto Alegre Dyspeptic Symptoms Questionnaire; Pts= Patients]; \* represents an abstract; <sup>T</sup> data from Dr. Jan Tack's group**

| Author, Year Reference #           | n   | Pts          | Symptom Assessment                                | Study Type | GE breath test                                                                | Measurement                                                                                   | Symptom/Composite                                                                                                                                                                                                                                                          |
|------------------------------------|-----|--------------|---------------------------------------------------|------------|-------------------------------------------------------------------------------|-----------------------------------------------------------------------------------------------|----------------------------------------------------------------------------------------------------------------------------------------------------------------------------------------------------------------------------------------------------------------------------|
| <sup>1</sup> Tack, 2010 (1)        | 636 | FD           | UGI Sx; 4 pt Likert                               | P          | <sup>14</sup> C-OCT 4H solid<br><sup>13</sup> C-GLY 4H liquid                 | T <sub>1/2</sub>                                                                              | Significant association with T <sub>1/2</sub> and N/V, ES/F, epigastric sx (p< 0.0001).                                                                                                                                                                                    |
| <sup>1</sup> Karamanolis, 2006 (2) | 592 | FD           | 8 UGI Sx; 4 pt Likert                             | P          | <sup>14</sup> C-OCT 4H solid<br><sup>13</sup> C-GLY 4H liquid                 | T <sub>1/2</sub> > 109 min for solids, >74 min for liquids                                    | Pts with combination UGI Sx (AP & F) had a higher prevalence of delayed GE for solids (P=0.03, t test) and a longer GE T <sub>1/2</sub> solids (P=0.02, t test).                                                                                                           |
| <sup>1</sup> Vanheel, 2017 (3)     | 533 | FD           | 6 UGI Sx; 6 pt Likert                             | P          | <sup>14</sup> C-OCT 4H solid                                                  | T <sub>1/2</sub> > 109 min for solids                                                         | <b>In the symptomatic group, t<sub>1/2</sub> was associated with N (OR 2.07 [1.31-3.26]) and cumulative symptom score (AP, N, B, F) (p=0.17, P=0.02).</b>                                                                                                                  |
| <sup>1</sup> Sarnelli, 2003 (4)    | 392 | FD           | 8 UGI Sx; 4 pt Likert                             | P          | <sup>14</sup> C-OCT 4H solid [n=392]<br><sup>13</sup> C-GLY 4H liquid [n=330] | T <sub>1/2</sub> >109 min for solids, >74 min for liquids                                     | The severity of UGI Sx [F (P<0.01), B (P<0.01), ES (P<0.05), N (P<0.05), and V (P<0.01), t test] was associated with delayed solid GE. On multivariate analysis V (OR 2.65 [1.62-4.35]) and F (OR 3.08 [1.28 - 9.16]) were independently associated with delayed solid GE. |
| Perri, 1998 (5)                    | 304 | FD           | 4 UGI Sx; 4 pt Likert                             | P          | <sup>13</sup> C-OCT 4H solid                                                  | T <sub>1/2</sub> ≥140 min.                                                                    | <b>Delayed GE was independently associated with a cumulative score ≥6 for F, N, and V [OR 3.13 (1.06-9.18)]. Delayed GE was associated with F (p, 0.05, t test) as compared to normal GE.</b>                                                                              |
| <sup>1</sup> Bisschops, 2008 (6)   | 218 | FD           | 8 UGI Sx; 4 pt Likert                             | P          | <sup>14</sup> C-OCT 4H solid;<br><sup>13</sup> C-GLY 4H liquid                | T <sub>1/2</sub> (minutes)                                                                    | Based on student t test, F (P<0.005), B (P=0.04), AP (P=0.02) and N (P=0.02) were significantly associated with delayed solid GE. Severity of meal-induced N was significantly associated delayed liquid GE.                                                               |
| <sup>1</sup> Fischler, 2003 (7)    | 204 | FD           | 8 UGI Sx; 4 point Likert                          | CS         | <sup>14</sup> C- OCT 4H solid                                                 | T <sub>1/2</sub> > 80 min                                                                     | t <sub>1/2</sub> was correlated to a composite of 4 Sx (N, V, ES & weight loss) (P=0.001) and a 2 Sx composite (F & B) (P=0.009).                                                                                                                                          |
| Samsom, 2003 (8)                   | 186 | DM1, DM2     | Prior 2 wks: 9 UGI Sx; During GE: 4 UGI Sx; VAS   | P          | <sup>13</sup> C- OCT 4H solid                                                 | T <sub>1/2</sub> > 120 min; Gastric retention (2h) > 40%                                      | UGI Sx (F, N, V, AP) on 4 point Likert scale, predicted GE (r = 0.46, p < 0.001).                                                                                                                                                                                          |
| <sup>1</sup> Kindt, 2009 (9)       | 161 | FD           | PAGI-SYM                                          | P          | <sup>14</sup> C- OCT 4H solid                                                 | T <sub>1/2</sub> > 80 min                                                                     | Pts with delayed GE had higher scores for N/V (r=0.19), F/ES (r=0.2), B and AP (r=0.22, all P<0.05).                                                                                                                                                                       |
| Ron, 2011 (10)                     | 111 | FD           | UGI Sx                                            | P          | <sup>13</sup> C- OCT 4H solid                                                 | T <sub>1/2</sub> > 94 min (mild); 200-299 (moderate); ≥ 300 severe; tlag > 52 min; GEC < 2.95 | <b>ES was significantly associated with delayed GE based on logistic regression (OR 2.29 [1.01-5.18]).</b>                                                                                                                                                                 |
| Bharucha, 2015 (11)                | 78  | DM1          | GCSI                                              | P          | <sup>13</sup> C-spirulina 4H solid                                            | T <sub>1/2</sub> > 92 min                                                                     | Composite score of N, F, V & AP score did correlated with GE t <sub>1/2</sub> (rs = 0.25, p=0.049).                                                                                                                                                                        |
| Sfarti, 2010 (12)                  | 69  | DM1          | 6 UGI Sx; 4 pt Likert                             | P          | <sup>13</sup> C- OCT 4H solid                                                 | T <sub>1/2</sub> ≥ 135 min and GEC ≥ 3.1                                                      | <b>B and AP were more frequently present in diabetic patients with delayed GE as compared to those with normal GE (p&lt;0.05, student t test).</b>                                                                                                                         |
| Marie, 2012 (13)                   | 57  | Sclero derma | 9 GI Sx; 4 pt Likert , global symptom score (GSS) | P          | <sup>13</sup> C- OCT 8H solid                                                 | T <sub>1/2</sub> >166 min                                                                     | <b>V, AP, and B are individually associated with delayed GE in inactive CD (p &lt; 0.01, Mann Whitney) as compared to pts without delayed GE. GSS &gt;5 was significantly associated with delayed GE (OR 32.1 [4.99-204]).</b>                                             |

|                                   |     |                        |                                          |   |                                                                 |                                                                                                                                   |                                                                                                                                                                                                                             |
|-----------------------------------|-----|------------------------|------------------------------------------|---|-----------------------------------------------------------------|-----------------------------------------------------------------------------------------------------------------------------------|-----------------------------------------------------------------------------------------------------------------------------------------------------------------------------------------------------------------------------|
| Salles Junior, 2013 (14)          | 50  | ESRD on HD             | PADYQ                                    | P | <sup>13</sup> C- OCT 4H solid                                   | T <sub>1/2</sub> > 200 min                                                                                                        | Dyspepsia score (AP, N, V, B, ES) was positively correlated with t <sub>1/2</sub> (r=0.366, p=0.009).                                                                                                                       |
| <sup>1</sup> Tack, 1998 (15)      | 40  | FD                     | 8 UGI Sx; 4 pt Likert                    | P | <sup>14</sup> C- OCT 4H solid                                   | T <sub>1/2</sub> (min) > 95% CI in HV                                                                                             | Multivariate analysis demonstrated association between severe N and delayed GE (OR 9.52 [2.22-52.8]).                                                                                                                       |
| Ziegler, 1996 (16)                | 34  | Insulin treated DM     | 6 UGI Sx; 4 pt Likert                    | P | <sup>13</sup> C- OCT 4H solid Scintigraphy 2H solid             | T <sub>1/2</sub> breath, lag phase, and GEC<br>T <sub>1/2</sub> scint > 100 min                                                   | Gastric Sx (N, V, AP, B, ES, anorexia) score was significantly associated with t <sub>1/2</sub> (rs=0.53, p<0.05), GEC (rs=-0.59, p<0.05) by breath test, and by t <sub>1/2</sub> scintigraphy (rs=0.33, p<0.05).           |
| Lo Cascio, 2016 (17)              | 33  | Duchenne MD            | Short Form Leeds Dyspepsia Questionnaire | P | <sup>13</sup> C OCT 8H solid                                    | T <sub>1/2</sub> >117.2 min<br>Tlag>80.3 min                                                                                      | Significant association between UGI Sx (indigestion, heartburn, regurgitation, N) and Tlag (p = 0.047). No such association seen with GCSI.                                                                                 |
| Sales, 2015 * (18)                | 27  | 14 CD<br>13 UC         | PADYQ                                    | P | <sup>13</sup> C- OCT solid                                      | T <sub>1/2</sub> (minutes)                                                                                                        | IBD patients with UGI Sx (AP, ES, N, V, B) (T <sub>1/2</sub> =265.9 ± 21.7 min) had significantly longer GE (p<0.05) as compared to IBD controls (T <sub>1/2</sub> = 220.2 ± 16.1 min).                                     |
| Nobrega, 2012 (19)                | 26  | CD                     | PADYQ                                    | P | <sup>13</sup> C- OCT 4H solid                                   | T <sub>1/2</sub> > 200 min; t lag > 150 min                                                                                       | CD with dyspepsia (≥ 6 sx assessment of AP, ES, N, V, B) had significantly prolonged t <sub>1/2</sub> (p=0.04, t test), not T <sub>lag</sub> . Only V associated with delayed GE (P<0.05, t test) based on t <sub>1/2</sub> |
| Gourcerol, 2007 (20)              | 15  | Chronic N/V            | UGI Sx; 5 pt Likert                      | P | <sup>13</sup> C OCT 4H solid                                    | Gastric retention >10%                                                                                                            | No significant associations                                                                                                                                                                                                 |
| <sup>1</sup> Kindt, 2008 (21)     | 78  | FD                     | 9 UGI Sx; 4 pt Likert                    | P | <sup>13</sup> C- OCT 4H solid                                   | T <sub>1/2</sub> > 94 min; tlag > 52 min                                                                                          |                                                                                                                                                                                                                             |
| Mori, 2017 (22)                   | 126 | FD                     | UGI Sx                                   | P | <sup>13</sup> C-acetate 1.5H liquid                             | Tmax - M > 60 min; F > 75 min                                                                                                     |                                                                                                                                                                                                                             |
| <sup>1</sup> Kindt, 2011 (23)     | 253 | FD                     | 8 UGI Sx; 4 pt Likert                    | P | <sup>14</sup> C- OCT 4H solid;<br><sup>13</sup> C-GLY 4H liquid | T <sub>1/2</sub> > 109 min for solids, >74 min for liquids                                                                        |                                                                                                                                                                                                                             |
| <sup>1</sup> Clauwaert, 2012 (24) | 259 | FD                     | 8 UGI Sx; 4 pt Likert                    | P | <sup>14</sup> C- OCT 4H solid                                   | T <sub>1/2</sub> > 80 min                                                                                                         |                                                                                                                                                                                                                             |
| Talley, 2001 (25)                 | 798 | FD (551) and DM1 (247) | 8 UGI Sx; VAS                            | P | <sup>13</sup> C- OCT 4H solid                                   | T <sub>1/2</sub> and lag (min), and β;<br>T <sub>1/2</sub> >123–192 min moderate delay;<br>T <sub>1/2</sub> >192 min severe delay |                                                                                                                                                                                                                             |

**Supplemental Table 2. Details of the gastric scintigraphy studies in patients with or without gastroparesis and relationship with symptoms of nausea (N), vomiting (V), fullness (F), early satiety (ES) and abdominal pain (AP): [OR = odds ratio (95% confidence interval, CI); AIG: Autoimmune Gastritis; CS: cross-sectional; GCSI: gastroparesis cardinal symptom index; P= prospective study; PAGI-SYM: Patient Assessment of Gastrointestinal Disorders Symptom Severity Index; R= retrospective study; Sx=symptoms; FD= functional dyspepsia); \* represents an abstract; <sup>c</sup> data from Dr. Michael Camilleri's group; <sup>o</sup> data from Gastroparesis Registry from National Institute of Diabetes and Digestive and Kidney Diseases; <sup>H</sup> data from Dr. Michael Horowitz's group – both FD and DM; <sup>o</sup> data from Dr. Eva Olausson; <sup>P</sup> data from Dr. Henry Parkman's group; <sup>S</sup> data from Dr. Stanghellini group; <sup>T</sup> data from Dr. Jan Tack group**

| Author, Year Reference #             | n    | Pts    | Symptom Assessment       | Study Type | GE Method               | Measurement                                                                                                                                     | Symptom/Composite                                                                                                                                                                                                                                                                                                                                              |
|--------------------------------------|------|--------|--------------------------|------------|-------------------------|-------------------------------------------------------------------------------------------------------------------------------------------------|----------------------------------------------------------------------------------------------------------------------------------------------------------------------------------------------------------------------------------------------------------------------------------------------------------------------------------------------------------------|
| <sup>P</sup> Pathikonda, 2012 (26)   | 1499 | UGI Sx | PAGI-SYM                 | P          | Solid 4H                | Delayed: 1h >90%, 2h >60%, 3h >30%, 4h >10% Severity 4h: mild 10-20%, moderate 20-35%, severe 35-50%, very severe >50%; Rapid: 1h <30%, 2h <10% | N, V, AP were more prevalent in delayed GE as compared to normal or rapid GE (all p < 0.001, t test with bonferroni correction).                                                                                                                                                                                                                               |
| <sup>c</sup> Park, 2017 (27)         | 1287 | UGI Sx | UGI Sx                   | R          | Solid 4H                | GE delay: 4h <84%<br>Rapid: 1h>39%                                                                                                              | Pts with delayed GE has significantly more frequent N and V (all p<0.05, multiple variable logistic regression model).<br>Delayed GE associated with increased N: OR 1.50 [1.13, 2.00], and weight loss >10% OR 1.69 [1.22, 2.35], and reduced B OR 0.69 [0.53, 0.91]<br>Accelerated GE associated with reduced abdominal discomfort/pain OR 0.73 [0.53, 0.91] |
| Talley, 2006 (28)                    | 864  | FD     | 5 UGI Sx; 4 point Likert | R          | Solid 4H                | Retention at 4h > 6.3%                                                                                                                          | Univariate analysis demonstrated significant association between delayed GE and ES, F, B, N, AP. (all p<0.03)<br>Multivariate analysis demonstrated an association between F and delayed GE (OR 1.98, [1.02-3.86]).                                                                                                                                            |
| <sup>P</sup> Sachdeva, 2011(29)      | 449  | UGI Sx | PAGI-SYM                 | CS         | Solid 4H<br>Liquid 6H   | Solid: Delayed: Retention at 2h >60% & 4h >10%<br>-Rapid: Retention at 1h <35%<br>Liquid: Delayed: retention at 1h >50%                         | N (r = 0.136, p <0.05), V (r = 0.173, p <0.05), ES (r = 0.133, p <0.05), F (r = 0.173, p<0.05), and total GCSI subscore (N/V, F, B) (r = 0.141, p<0.05) was associated with GE at 4h.                                                                                                                                                                          |
| <sup>P</sup> Khayyam, 2010 #123 (30) | 388  | UGI Sx | PAGI-SYM                 | P          | Solid 4H                | Delayed GE: Retention at 2h >60% & 4h >10%<br>Rapid GE: Retention at 1h <35%                                                                    | F, B, and AP were significant higher in patients with delayed GE as compared to controls. (all p<0.05 t test)                                                                                                                                                                                                                                                  |
| <sup>S</sup> Stanghellini, 1996 (31) | 343  | FD     | 4 UGI Sx; 4 point Likert | P          | Solid 3H                | Emptying rate < 0.42%/h (M) and < 0.35%/h (F)<br>Lag phase > 54 min (M) and > 37 min (F)                                                        | Lower GE rates in patients with UGI Sx (≥3 sx score measuring AP, F, N, V) as compared to controls (p=0.0001). Logistic regression analysis demonstrated an independent correlation of severe V (OR 4.04 [1.3-12.54]) and severe F (OR 2.34 [1.45-3.75]) to delayed GE.                                                                                        |
| <sup>S</sup> Stanghellini, 2003(32)  | 327  | UGI Sx | 7 UGI Sx; 5 point Likert | P          | Solid 3H                | Emptying rate < 0.42%/h (M) and < 0.35%/h (F) Lag phase > 54 min (M) and > 37 min (F)                                                           | Multivariate analysis demonstrated F was independently associated with delayed GE (OR 4.1[1.7-10.2]). Mann Whitney demonstrated an association between F, B, and N in delayed GE as compared to healthy controls (all p<0.05).                                                                                                                                 |
| Musaib-Ali, 2012* (33)               | 324  | UGI Sx | GCSI                     | P          | Solid 3H<br>Liquid 0.5H | Liquid: delayed t1/2 > 22 min<br>Solid: delayed GE (4h) <90%                                                                                    | Loss of appetite (p=0.03, t test) and V (p<0.01, t test) was associated with delayed GE.                                                                                                                                                                                                                                                                       |

|                                     |     |                         |                                          |   |                     |                                                                                                                      |                                                                                                                                                                                                                                                                                                                               |
|-------------------------------------|-----|-------------------------|------------------------------------------|---|---------------------|----------------------------------------------------------------------------------------------------------------------|-------------------------------------------------------------------------------------------------------------------------------------------------------------------------------------------------------------------------------------------------------------------------------------------------------------------------------|
| Halawi, 2017 (34)                   | 285 | 26 obese<br>259 healthy | UGI Sx in response to dyspeptogenic meal | P | Solid 4H            | GE T <sub>1/2</sub> ; GE 2h, 4h; GE lag time                                                                         | GE T <sub>1/2</sub> was significant associated with N (r=0.145, p=0.026), AP (r=0.149, p=0.012), and higher aggregate Sx score (F, N, B, AP) (r=0.132, p 0.026).                                                                                                                                                              |
| DiBaise, 2016 (35)                  | 266 | UGI Sx                  | GCSI                                     | P | Solid 4H            | Retention at 2h >60% and 4h ≥16%                                                                                     | <b>N/V, F/ES, and total GCSI total score (N, retching, V, F, ES, F, anorexia, B, stomach enlargement) was significantly associated with abnormal GE at 4 hours (all p&lt;0.03, t test). Logistic regression demonstrated a significant correlation between increased GCSI score and delayed GE (OR= 1.551 [1.153-2.087]).</b> |
| <sup>P</sup> Cassilly, 2008 (36)    | 226 | UGI Sx                  | GCSI                                     | P | Solid 4H            | Retention at 2h < 50% & 4h <10%                                                                                      | N and V were significantly associated with gastroparesis at 4 hours as compared to healthy controls (p<0.05, based on student t test).                                                                                                                                                                                        |
| Boltin, 2014 (37)                   | 193 | UGI Sx                  | UGI Sx                                   | R | Solid 2H            | T <sub>1/2</sub> > 100 min                                                                                           | <b>V was associated with delayed GE (OR 2.54 [1.2-5.35])</b>                                                                                                                                                                                                                                                                  |
| <sup>P</sup> Parkman, 2017* (38)    | 177 | UGI Sx                  | PAGI-SYM                                 | P | Solid 4H            | Delayed: Retention >60% (2h) and/or >10% (4h)                                                                        | Increased solid gastric retention 4h was associated with vomiting (p=0.03). Increased solid gastric retention 1h was associated with increased severity of F (p=0.04) and B (p=0.04).                                                                                                                                         |
| Stanghellini, 2002 (39)             | 146 | IBS                     | 4 UGI Sx; 4 point Likert                 | P | Solid 3H            | Emptying rate < 0.42%/h (M) and < 0.35%/h (F)<br>Lag phase > 54 min (M) and > 37 min (F)                             | <b>Logistic regression demonstrated that F (OR =4.7, [1.8-12.5]) and N (OR=3.3, CI 1.2-9.3) were independently associated with delayed GE. IBS patients with UGI Sx (F, B, V, V) had delayed GE rates as compared to controls (p&lt;0.01).</b>                                                                                |
| <sup>O</sup> Olausson, 2013 (40)    | 115 | Insulin treated DM      | PAGI-SYM                                 | P | Solid 3H            | Retention at 2h (%)<br>M > 51%; F >55-66% based on age                                                               | Spearman correlation demonstrated a positive correlation between N/V (r=0.3, p<0.001) and F/ES (r=0.34, p<0.0001) with GE. No median subscale score differences were noted between normal GE and gastroparesis.                                                                                                               |
| <sup>H</sup> Jones, 2001 (41)       | 101 | DM1 and DM2             | 9 UGI Sx; 4 point Likert                 | P | Solid and liquid 2H | Solid: Retention at 100min > 61% ;<br>Liquid: T <sub>1/2</sub> > 31 min                                              | UGI Sx (anorexia, N, ES, B,F, V, AP) was associated with increased GE (p<0.005). Severity of UGI Sx correlated with solid GE (r = 0.22, p<0.05). B/F was related to solid GE (r=0.29, p<0.005).                                                                                                                               |
| <sup>H</sup> Horowitz, 1991 (42)    | 87  | DM1 and DM2             | 9 UGI Sx; 4 point Likert                 | P | Solid and liquid 2H | Solid: Lag phase (min) and retention at 100min (5%)<br>Liquid: Retention at 10min (%) and T <sub>1/2</sub> (minutes) | UGI Sx (anorexia, N, ES, AP, V, B) correlated with amount of solid meal remaining in the stomach at 100 min (r=0.36, p<0.01).                                                                                                                                                                                                 |
| <sup>P</sup> Gonlachavit, 2006 (43) | 83  | FD & GERD               | 8 UGI Sx; 4 point Likert                 | P | Solid 4H            | Retention at 2h >50%                                                                                                 | Pts with V demonstrated greater total gastric retention at 2 and 3 h (p<0.05, t test). Delayed GE had more N and ES as compared to normal GE controls. (all p<0.05, t test) In a multivariable regression analysis demonstrated N was associated with GE. (OR 5.19 [1.43-18.89])                                              |
| <sup>O</sup> Olausson, 2014 (44)    | 83  | DM1 and DM2             | PAGI-SYM                                 | P | Solid 3H            | Delayed: Retention at 2h(%)<br>M >51%; F (<50 yo) >66% & (>50 yo) >55%                                               | UGI Sx (N/V, F/ES, B, AP, heartburn/regurgitation) were more severe in diabetic gastroparesis as compared to diabetics with normal GE (p=0.0001). UGI Sx severity had the best discriminative validity to identify diabetic gastroparesis (Area under the ROC curve =0.85).                                                   |
| Hellstrom, 2013* (45)               | 72  | DM (58 type 1,          | GCSI                                     | P | Solid 4H            | Retention > 10%                                                                                                      | Significant association between gastric retention and GCSI ((N, retching, V, F, ES, F, anorexia, B, stomach                                                                                                                                                                                                                   |

|                                  |    |                         |                                    |   |                       |                                                                                                               |                                                                                                                                                                                                                                                                               |
|----------------------------------|----|-------------------------|------------------------------------|---|-----------------------|---------------------------------------------------------------------------------------------------------------|-------------------------------------------------------------------------------------------------------------------------------------------------------------------------------------------------------------------------------------------------------------------------------|
|                                  |    | 14 type 2)              |                                    |   |                       |                                                                                                               | enlargement), $r=0.43$ , $p<0.01$ .                                                                                                                                                                                                                                           |
| Kalkan, 2016 (46)                | 62 | AIG                     | GCSI                               | P | Solid 2H              | $T_{1/2} > 110$ min                                                                                           | Mean GCSI (total score- N, retching, V, F, ES, F, anorexia, B, stomach enlargement) was significantly higher in patients with delayed GE compared to patients with normal GE ( $1.89 \pm 1.16$ vs $0.4 \pm 0.3$ , $p<0.001$ ).                                                |
| Tseng, 2014 (47)                 | 60 | 30 FD, 30 DM1 + UGI Sx  | GCSI                               | P | Solid 4H              | Lag phase, $T_{1/2}$ , Retention at 1h $>65\%$ , 2h $>28\%$ , and 3 h $>8\%$                                  | N ( $r_s = 0.339$ , $p < 0.01$ ) and V ( $r_s = 0.271$ , $p < 0.05$ ) was significantly associated with $t_{1/2}$ (3h). B was significantly associated with retention at 3 h ( $r_s = 0.292$ , $p < 0.05$ ).                                                                  |
| Grad, 2012 (48)                  | 55 | DM                      | GCSI                               | P | Solid 2H              | Retention at 1h $> 90\%$ and 2h $>60\%$                                                                       | <b>Based on the student t test, F and ES were present more frequently in delayed GE (<math>p&lt;0.05</math>). Nausea (<math>r = -0.65</math>, <math>p&lt;0.05</math>) and ES (<math>r=-0.58</math>, <math>p&lt;0.05</math>) significantly correlated with severity of GE.</b> |
| <sup>P</sup> Cuomo, 2001 (49)    | 52 | FD                      | 8 UGI Sx; 4 point Likert           | P | Solid 3H              | $T_{1/2} > 90$ min<br>Emptying rate $< 0.5\%/min$<br>Lag phase $> 10$ min                                     | <b>ES severity showed significantly increased severity of Sx with delayed GE based on lag phase and GE rate (<math>p&lt;0.01</math>) Multivariate analysis demonstrated B was directly associated with delayed GE based on <math>T_{1/2}</math> (OR 2.2, [1.02-4.84]).</b>    |
| <sup>H</sup> Horowitz, 1986 (50) | 45 | IDDM1                   | 9 UGI Sx; 4 point Likert           | P | Solid and liquid 2H   | Solid: Lag phase (min) and retention at 100min (5%)<br>Liquid: Retention at 10min (%) and $t_{1/2}$ (minutes) | The lag period ( $r=0.37$ , $P<0.02$ ) and percentage retention of solid at 100 min ( $r=0.37$ , $P=0.02$ ) correlated with UGI Sx (anorexia, N, ES, AP, B, V, AP). If patients score $> 4/18$ on UGI Sx assessment, they were more likely to have abnormal GE. ( $p<0.05$ )  |
| Faraj, 2007 (51)                 | 31 | DM1, DM2 + UGI Sx       | 16 GI Sx                           | P | Solid 1.2H            | $T_{1/2} > 70$ min                                                                                            | F was associated with delayed gastric emptying ( $P = 0.02$ ).                                                                                                                                                                                                                |
| Kawamura, 2012 (52)              | 24 | Chronic Hep C           | UGI Sx                             | P | Solid 2H              | Distal $T_{1/2} > 105$ min                                                                                    | Distal $T_{1/2}$ was significantly associated with ES ( $r=0.48$ , $p=0.02$ )                                                                                                                                                                                                 |
| Nowak, 1995 (53)                 | 21 | DM1                     | 3 symptoms by structured interview | P | Solid 3H              | $T_{1/2} > 272.9$ min (mean + 2 SD healthy controls)                                                          | <b>Diabetics with UGI Sx (N, V, ES) had statistically significant delay in GE (<math>p&lt;0.05</math>).</b>                                                                                                                                                                   |
| van Wijk, 1992 (54)              | 16 | IBS-C                   | 4 UGI Sx; 4 pt Likert              | P | Solid 1H              | Lag phase (min)<br>GE rate (%/min)                                                                            | No significant associations                                                                                                                                                                                                                                                   |
| <sup>H</sup> Jones, 1996 (55)    | 16 | DM2                     | 9 UGI Sx; 4 point Likert           | P | Liquid 3H             | $T_{1/2}$ (min) & lag phase (min)                                                                             |                                                                                                                                                                                                                                                                               |
| <sup>H</sup> Horowitz, 1989 (56) | 20 | DM2                     | 9 UGI Sx; 4 point Likert           | P | Solid and liquid 2H   | Solid: Lag phase (min) and retention at 100min (5%)<br>Liquid: Retention at 10min (%) and $T_{1/2}$ (min)     |                                                                                                                                                                                                                                                                               |
| <sup>H</sup> Trahair, 2016 (57)  | 21 | Mild – mod Parkinsonism | 8 UGI Sx; 4 pt Likert              | P | Liquid 3H             | $T_{1/2} > 157$ min                                                                                           |                                                                                                                                                                                                                                                                               |
| Punkkinen, 2008 (58)             | 27 | DM1                     | 9 UGI Sx                           | P | solid and liquid 1.5H | $T_{1/2} < 137$ min                                                                                           |                                                                                                                                                                                                                                                                               |
| Talley, 1989                     | 32 | UGI Sx                  | 4 UGI Sx                           | P | Solid 2.3H            | $T_{1/2}$ , lag parameter and rate of                                                                         |                                                                                                                                                                                                                                                                               |

|                                    |            |                         |                                 |           |                                   |                                                                                                    |  |
|------------------------------------|------------|-------------------------|---------------------------------|-----------|-----------------------------------|----------------------------------------------------------------------------------------------------|--|
| (59)                               |            |                         |                                 |           |                                   | emptying                                                                                           |  |
| <b>Wegener, 1989 (60)</b>          | <b>43</b>  | <b>UGI Sx</b>           | <b>5 UGI Sx; 4 point Likert</b> | <b>P</b>  | <b>Liquid 1H</b>                  | <b>Retention at 1h &gt; 82%</b>                                                                    |  |
| Waldron, 1991 (61)                 | 50         | UGI Sx                  | 7 UGI Sx; VAS                   | P         | Solid: until $t_{1/2}$ visualized | $T_{1/2}$ > 106 min & Lag phase (min)                                                              |  |
| Yu, 2012(62)                       | 59         | 27 migraine, 32 FD      | UGI Sx                          | P         | Solid 2H                          | $T_{1/2}$ > 100 min                                                                                |  |
| Lawal, 2007 (63)                   | 61         | Autonomic dysfunction   | GI Sx                           | R         | Solid 3H                          | $T_{1/2}$ > 120.6 min (M) and > 159.6 min (F)                                                      |  |
| Christensen, 2008 (64)             | 67         | CVS                     | UGI Sx                          | R         | Solid 4H                          | Gastric retention > 10%                                                                            |  |
| Anaparthi, 2009 (65)               | 69         | UGI Sx                  | GCSI                            | R         | Solid 4H                          | Gastric retention > 10%                                                                            |  |
| Gustafsson, 2011 (66)              | 84         | DM1 & DM2               | 15 GI Sx                        | P         | Solid 1.2H                        | $T_{1/2}$ > 70 min                                                                                 |  |
| <b>Guo, 2012 (67)</b>              | <b>93</b>  | <b>FD</b>               | <b>8 UGI Sx; 4 point Likert</b> | <b>CS</b> | <b>Solid 2H</b>                   | <b><math>T_{1/2}</math> &gt; 116.62 min</b>                                                        |  |
| <b>Bharucha, 2009 (68)</b>         | <b>129</b> | <b>DM1 &amp; DM2</b>    | <b>UGI Sx</b>                   | <b>R</b>  | <b>Solid 4H</b>                   | <b>Delayed emptying 2h &lt; 40%; 4h &lt; 84%</b><br><b>Rapid: Emptying 1h &gt; 39% 2h &gt; 76%</b> |  |
| Anudeep, 2016 (69)                 | 140        | DM2                     | GCSI                            | CS        | Solid 3H                          | Delayed: Retention at 2h > 35%; 3h > 10%; Rapid: Retention at 1h < 30%                             |  |
| <sup>c</sup> Bredenoord, 2003 (70) | 173        | UGI Sx                  | UGI Sx                          | R         | Solid 4H                          | Delayed: Emptying at 4h < 84%<br>Rapid: Emptying at 1h > 39%                                       |  |
| Lee, 2015* (71)                    | 214        | UGI Sx                  | 6 UGI Sx                        | --        | Solid 4H                          | Delayed: > 10% retention (4h)<br>Rapid: < 16% (2h)                                                 |  |
| <sup>c</sup> Pasricha, 2015 (72)   | 262        | UGI Sx                  | GCSI                            | R         | Solid 4H                          | Gastric retention > 20%                                                                            |  |
| <b>Hyett, 2009* (73)</b>           | <b>282</b> | <b>DM</b>               | <b>UGI Sx</b>                   | <b>R</b>  | <b>Solid 2H</b>                   | <b>&lt; 50% emptying at 50 min</b>                                                                 |  |
| <sup>c</sup> Pasricha, 2011 (74)   | 425        | N & V: 319 DGE; 106 NGE | GCSI                            | P         | Solid 4H                          | Delayed: Retention at 2h > 60% & 4h > 10%<br>Rapid: Retention at 1h < 30%                          |  |



**Supplemental Table 3. Gastric emptying studies in patients with gastroparesis and relationship with symptoms of nausea (N), vomiting (V), fullness (F), early satiety (ES) and abdominal pain (AP):** [DG= diabetic gastroparesis; GLY: glycine; IG= idiopathic gastroparesis; OCT: octanoate; P= prospective study; R= retrospective study; Sx=symptoms]; \* represents abstract; <sup>G</sup> data from Gastroparesis Registry from National Institute of Diabetes and Digestive and Kidney Diseases; <sup>P</sup> data from Dr. Henry Parkman's group

| Author, Year, (Reference #)     | n   | Pts                             | Symptom Assessment        | Study type | GE Method                        | Measurement                                                                                                                                                                                                  | Symptom/Composite                                                                                                                                                                                                                                                                                                                                                                                 |
|---------------------------------|-----|---------------------------------|---------------------------|------------|----------------------------------|--------------------------------------------------------------------------------------------------------------------------------------------------------------------------------------------------------------|---------------------------------------------------------------------------------------------------------------------------------------------------------------------------------------------------------------------------------------------------------------------------------------------------------------------------------------------------------------------------------------------------|
| Ardila-Hani, 2013 (75)          | 325 | 230 IG, 70 DG, 25 Post Surgical | GCSI                      | P          | Scintigraphy 4H solid            | T <sub>1/2</sub> (min) & lag phase (min)<br>Delayed: Gastric Retention at 1h >90%, 2h >60%, or 4h >10%<br>Rapid: Gastric Retention at 0.5 h <70% or 1h <30%                                                  | V was present more frequently in patient is idiopathic delayed GE as compared to normal GE (p=0.01). N was associated with post-surgical delayed GE as compared to normal GE (p=0.004). Severity of N and V positively correlated with retention at 2 h (p = 0.03 and p = 0.01, respectively).                                                                                                    |
| <sup>G</sup> Parkman, 2011 (76) | 243 | IG                              | PAGI-SYM                  | P          | Scintigraphy 4H solid            | Retention at 4h (%)<br>Mild ≤20%, moderate 20-35%, and severe >35%                                                                                                                                           | Patients with severe gastroparesis had more N, V, AP and higher total GCSI score(N, retching, V, F, ES, F, anorexia, B, stomach enlargement) as compared to mild to moderate gastroparesis. (all p<0.05)<br>Multivariable logistic regression demonstrated more severe N in patients with severe gastroparesis as compared to mild to moderate gastroparesis. (OR 1.25, p=0.02; 95% CI not given) |
| <sup>G</sup> Parkman, 2017 (77) | 198 | 134 IG 64 DG                    | PAGI-SYM                  | P          | Scintigraphy 4H solid and liquid | Solid: Retention at 2h >60% and 4h >10%:<br>GE solid @4h: mild ≤20%; moderate 20-35%; severe >35%<br>Liquid: Retention at 1h >50%                                                                            | Increasing severity of ES and F was associated with increasing gastric retention of a solid meal at 4 hours (all p=0.01).                                                                                                                                                                                                                                                                         |
| <sup>G</sup> Koch, 2014*(78)    | 104 | IG                              | UGI sx – VAS              | P          | Scintigraphy 4H solid            | 4h retention<br>Mild 10-20%<br>Moderate 20-25%<br>Severe > 35%                                                                                                                                               | F at 15 and 30 min after the start of a meal was associated with degree of gastroparesis (p=0.05)                                                                                                                                                                                                                                                                                                 |
| Borges, 2013 (79)               | 41  |                                 | UGI Sx                    | R          | Scintigraphy 2H solid or liquid  | Solid (T <sub>1/2</sub> min): mild = 121-132; moderate= 133-144; severe = 145-156; very severe > 156<br>Liquid (T <sub>1/2</sub> min): mild = 91-99; moderate = 100-108; severe = 109-117; very severe > 117 | No significant associations                                                                                                                                                                                                                                                                                                                                                                       |
| Modiri, 2012*(80)               | 56  |                                 | PAGI-SYM                  | P          | Scintigraphy 4H solid            |                                                                                                                                                                                                              |                                                                                                                                                                                                                                                                                                                                                                                                   |
| <sup>P</sup> Jaffe, 2011 (81)   | 59  | 20 DG, 39 IG                    | Nausea Profile / PAGI-SYM | P          | Scintigraphy 4H solid            | Retention at 2h >60% & 4h >10%                                                                                                                                                                               |                                                                                                                                                                                                                                                                                                                                                                                                   |
| <sup>P</sup> Cherian, 2010 (82) | 68  | 50 IG, 18 DG                    | PAGI-SYM                  | P          | Scintigraphy 4H solid            | Retention at 2h >60% & 4h >10%                                                                                                                                                                               |                                                                                                                                                                                                                                                                                                                                                                                                   |

|                                     |     |                |                       |   |                                                                     |                                                                                                                                                              |  |
|-------------------------------------|-----|----------------|-----------------------|---|---------------------------------------------------------------------|--------------------------------------------------------------------------------------------------------------------------------------------------------------|--|
| McCallum, 2007(83)                  | 106 |                | UGI Sx                | P | Scintigraphy 4H solid                                               | Retention > 6%                                                                                                                                               |  |
| <sup>G</sup> Parkman, 2016 (84)     | 159 | 107 IG, 52 DG  | PAGI-SYM              | P | Scintigraphy 4H solid and liquid                                    | Solid delayed: Retention 2h >60% and 4h >10%;<br>Liquid delayed: Retention at 1h >50%                                                                        |  |
| <sup>P</sup> Hassam, 2014* (85)     | 229 | 154 IG 53 DG   | PAGI-SYM              | P | Scintigraphy 4H solid                                               |                                                                                                                                                              |  |
| Kowalczyk, 2011* (86)               | 255 |                | PAGI-SYM              | P | Scintigraphy 4H solid                                               |                                                                                                                                                              |  |
| <sup>G</sup> Hasler, 2011 (87)      | 335 | 219 IG, 116 DG | GCSI                  | P | Scintigraphy 4H solid                                               | Retention at 2h >60% & 4h >10%                                                                                                                               |  |
| <sup>G</sup> Hasler, 2013 (88)      | 393 | 256 IG, 137 DG | PAGI-SYM              | P | Scintigraphy 2&4H solid                                             | Retention at 2h >60% & 4h >10%                                                                                                                               |  |
| <sup>P</sup> Karamanolis, 2007 (89) | 58  | IG             | 8 UGI Sx; 4 pt Likert | P | <sup>14</sup> C-OCT BT 4H solid<br><sup>13</sup> C-GLY BT 4H liquid | T <sub>1/2</sub> > 109 min for solids, >74 min for liquids                                                                                                   |  |
| Butt, 2014*(90)                     | 15  | Parkinso nism  | GCSI                  | P | WMC                                                                 |                                                                                                                                                              |  |
| Barshop, 2015 (91)                  | 39  | 26 IG 13 DG    | GCSI                  | R | WMC                                                                 | AUC duodenal and antral motility. WMC defines gastric emptying based on changes in pH profile. The 5 h time point was used to mark delayed gastric emptying. |  |

Supplemental Figure 2. Waterfall plot demonstrating association between gastric emptying breath test and upper gastrointestinal symptoms in patients with or without gastroparesis

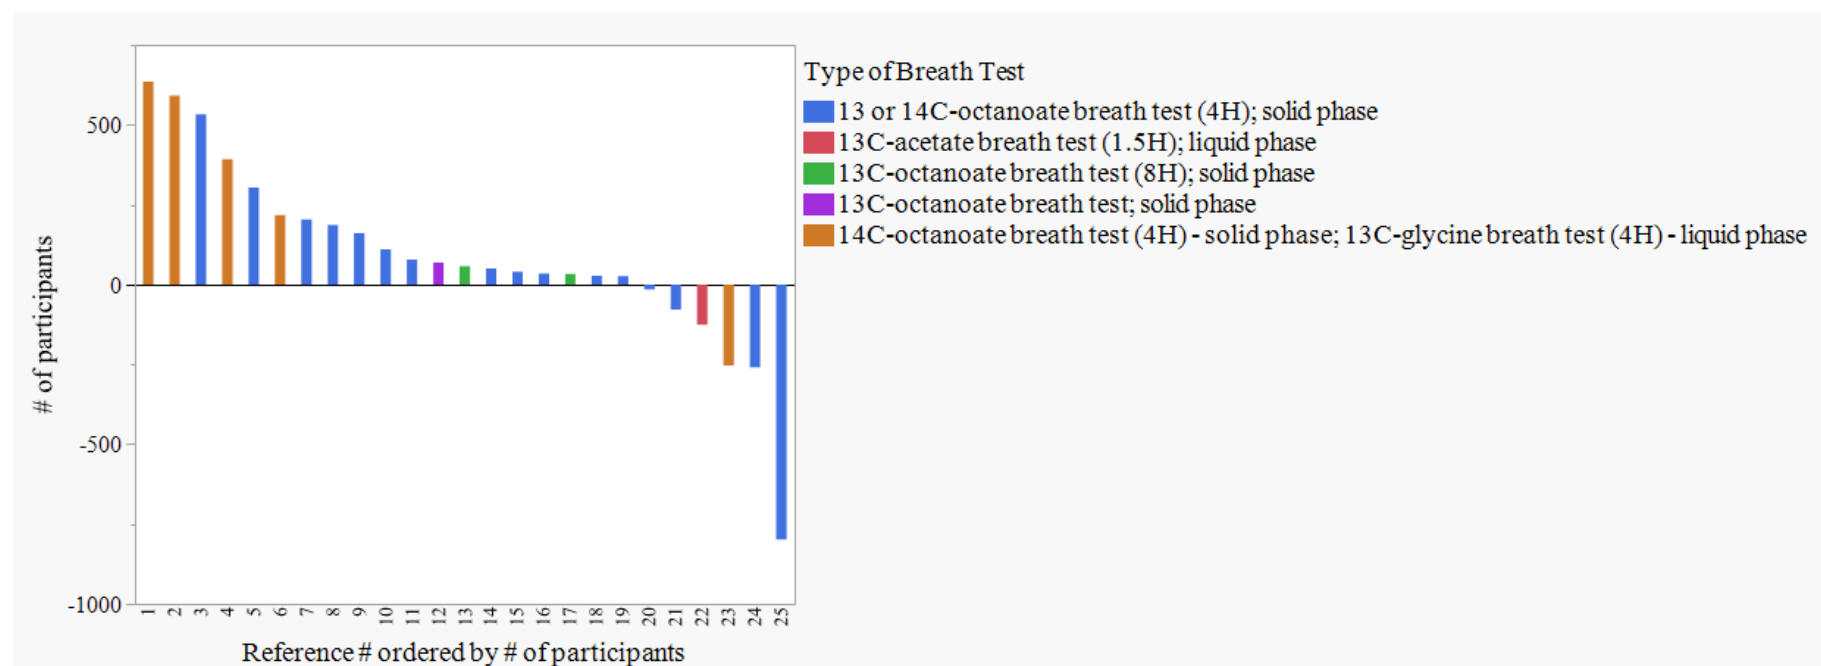

Supplemental Figure 3. Waterfall plot demonstrating association between gastric emptying by scintigraphy and upper gastrointestinal symptoms in patients with or without gastroparesis

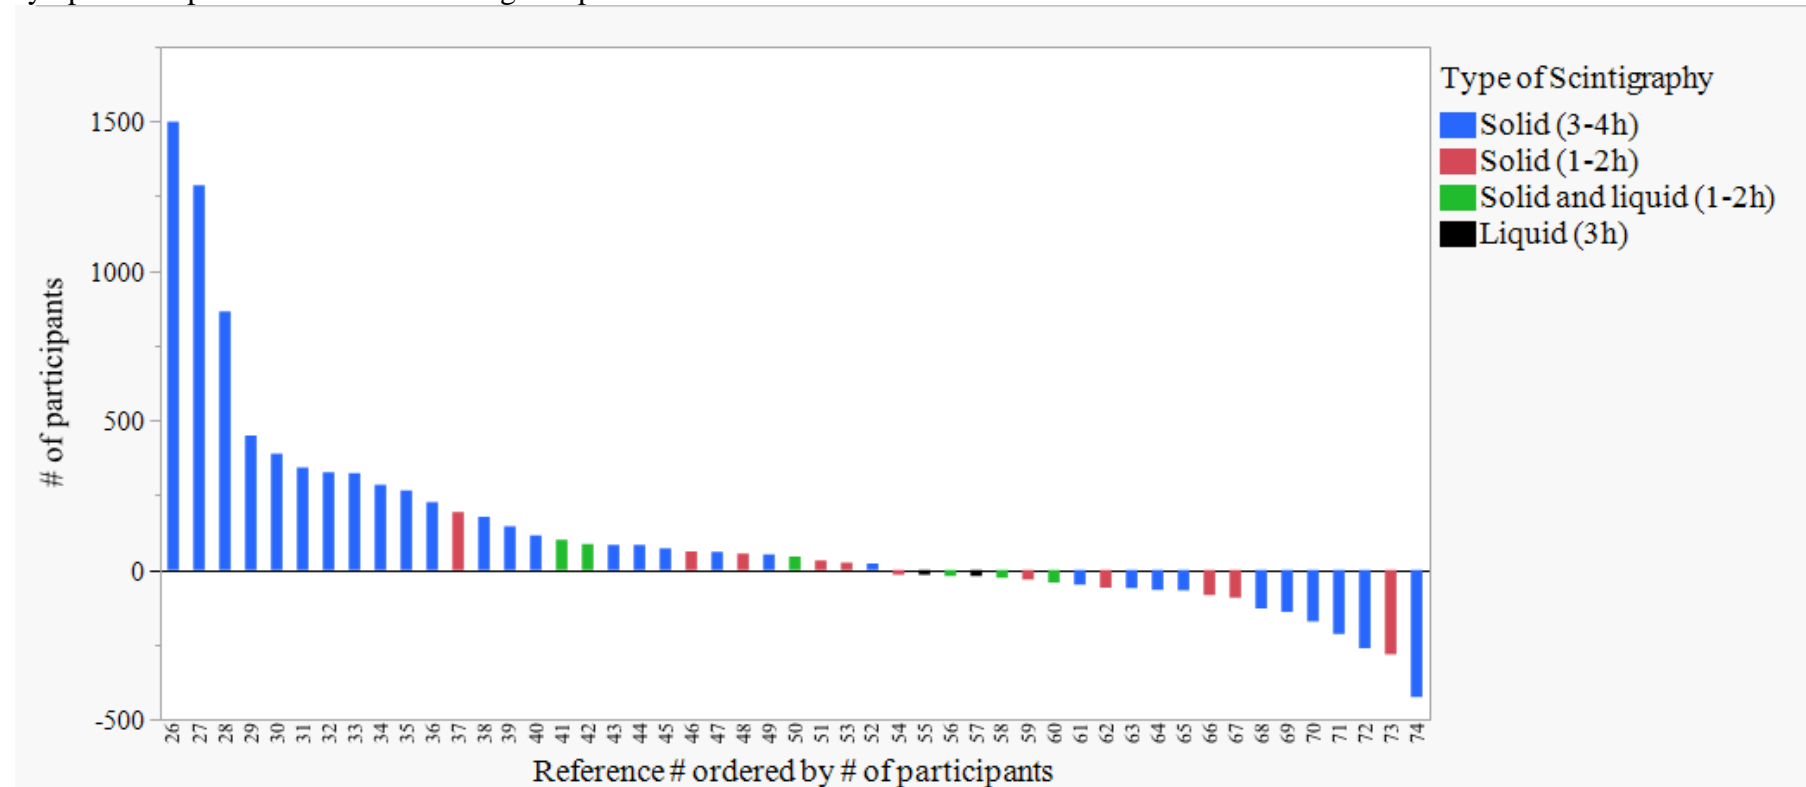

Supplemental Figure 4. Waterfall plot demonstrating association between gastric emptying and upper gastrointestinal symptoms in patients with gastroparesis.

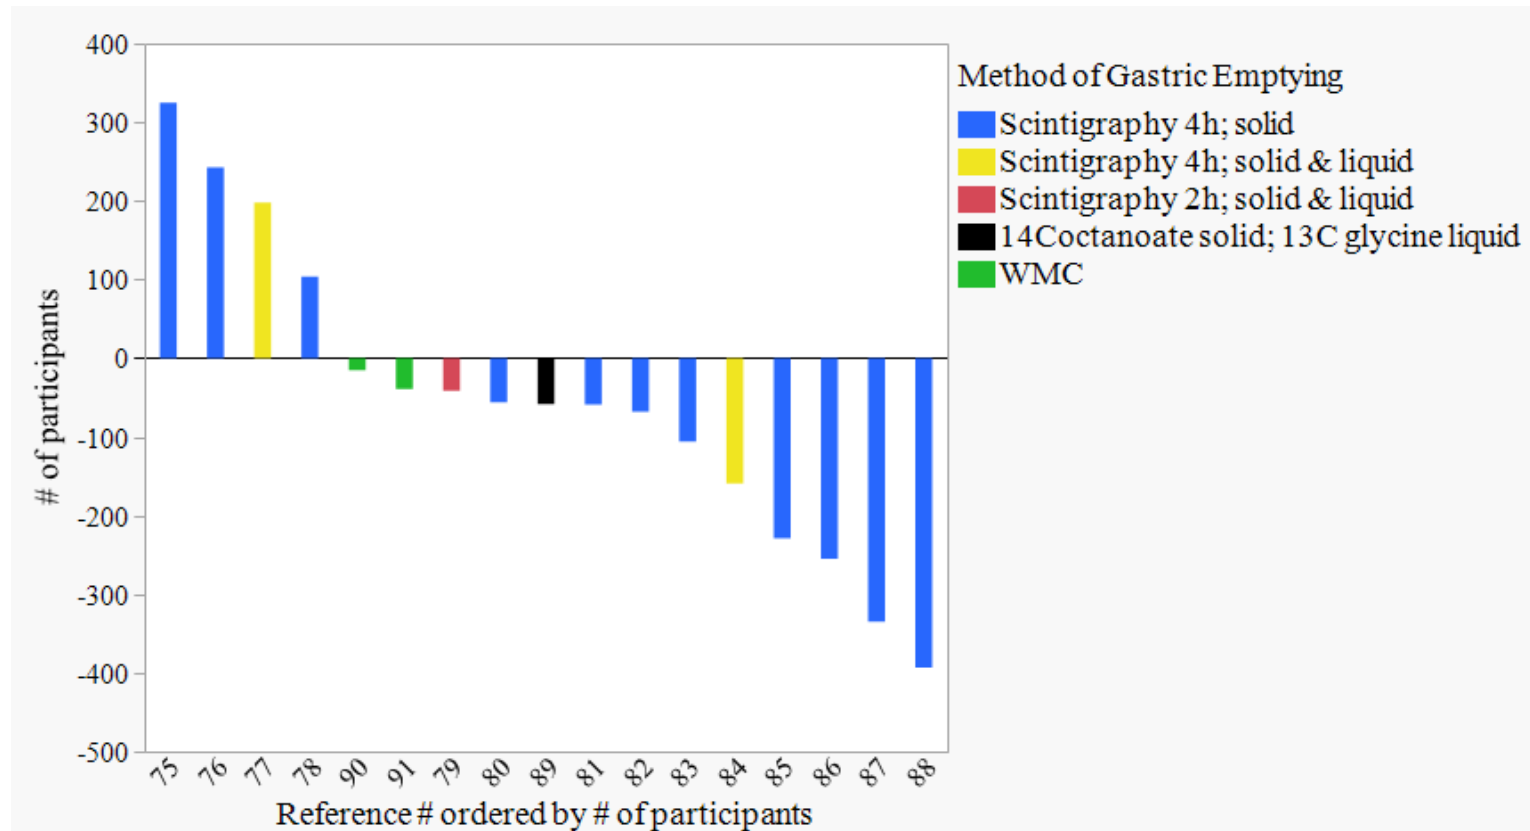

## Supplemental References

1. Tack J, Jones MP, Karamanolis G, Coulie B, Dubois D. Symptom pattern and pathophysiological correlates of weight loss in tertiary-referred functional dyspepsia. *Neurogastroenterol Motil.* 2010;22(1):29-35, e4-5.
2. Karamanolis G, Caenepeel P, Arts J, Tack J. Association of the predominant symptom with clinical characteristics and pathophysiological mechanisms in functional dyspepsia. *Gastroenterology.* 2006;130(2):296-303.
3. Vanheel H, Carbone F, Valvekens L, Simren M, Tornblom H, Vanuytsel T, et al. Pathophysiological Abnormalities in Functional Dyspepsia Subgroups According to the Rome III Criteria. *Am J Gastroenterol.* 2017;112(1):132-40.
4. Sarnelli G, Caenepeel P, Geypens B, Janssens J, Tack J. Symptoms associated with impaired gastric emptying of solids and liquids in functional dyspepsia. *Am J Gastroenterol.* 2003;98(4):783-8.
5. Perri F, Clemente R, Festa V, Annese V, Quitadamo M, Rutgeerts P, et al. Patterns of symptoms in functional dyspepsia: role of *Helicobacter pylori* infection and delayed gastric emptying. *The American journal of gastroenterology.* 1998;93(11):2082-8.
6. Bisschops R, Karamanolis G, Arts J, Caenepeel P, Verbeke K, Janssens J, et al. Relationship between symptoms and ingestion of a meal in functional dyspepsia. *Gut.* 2008;57(11):1495-503.
7. Fischler B, Tack J, De Gucht V, Z'IV S, Persoons P, Broekaert D, et al. Heterogeneity of symptom pattern, psychosocial factors, and pathophysiological mechanisms in severe functional dyspepsia. *Gastroenterology.* 2003;124(4):903-10.
8. Samsom M, Vermeijden J, Smout A, Van Doorn E, Roelofs J, Van Dam P, et al. Prevalence of delayed gastric emptying in diabetic patients and relationship to dyspeptic symptoms. *Diabetes care.* 2003;26(11):3116-22.
9. Kindt S, Dubois D, Van Oudenhove L, Caenepeel P, Arts J, Bisschops R, et al. Relationship between symptom pattern, assessed by the PAGI-SYM questionnaire, and gastric sensorimotor dysfunction in functional dyspepsia. *Neurogastroenterol Motil.* 2009;21(11):1183-e105.
10. Ron Y, Sperber AD, Levine A, Shevah O, Dickman R, Avni Y, et al. Early satiety is the only patient-reported symptom associated with delayed gastric emptying, as assessed by breath-test. *J Neurogastroenterol Motil.* 2011;17(1):61-6.
11. Bharucha AE, Batey-Schaefer B, Cleary PA, Murray JA, Cowie C, Lorenzi G, et al. Delayed Gastric Emptying Is Associated With Early and Long-term Hyperglycemia in Type 1 Diabetes Mellitus. *Gastroenterology.* 2015;149(2):330-9.
12. Sfarti C, Trifan A, Hutanasu C, Cojocariu C, Singeap AM, Stanciu C. Prevalence of gastroparesis in type 1 diabetes mellitus and its relationship to dyspeptic symptoms. *Journal of Gastrointestinal and Liver Diseases.* 2010;19(3):279-84.
13. Marie I, Gourcerol G, Leroi AM, Menard JF, Levesque H, Ducrotte P. Delayed gastric emptying determined using the <sup>13</sup>C-octanoic acid breath test in patients with systemic sclerosis. *Arthritis Rheum.* 2012;64(7):2346-55.
14. Salles Junior LD, Santos PR, Dos Santos AA, De Souza MHL. Dyspepsia and gastric emptying in end-stage renal disease patients on hemodialysis. *BMC Nephrology.* 2013;14 (1):275.
15. Tack J, Piessevaux H, Coulie B, Caenepeel P, Janssens J. Role of impaired gastric accommodation to a meal in functional dyspepsia. *Gastroenterology.* 1998;115(6):1346-52.
16. Ziegler D, Schadeewaldt P, Mirza AP, Piolot R, Schommartz B, Reinhardt M, et al. [<sup>13</sup>C] Octanoic acid breath test for non-invasive assessment of gastric emptying in diabetic patients: Validation and relationship to gastric symptoms and cardiovascular autonomic function. *Diabetologia.* 1996;39(7):823.
17. Lo Cascio CM, Goetze O, Latshang TD, Bluemel S, Frauenfelder T, Bloch KE. Gastrointestinal dysfunction in patients with Duchenne muscular dystrophy. *PLoS ONE.* 2016;11 (10):e0163779.

18. Sales KMO, Cavalcanti RF, Ponte CA, Souza MAN, Braga LLB, Oliveira RB, et al. Dyspeptic symptoms in inflammatory bowel diseases (IBD) are associated with prolonged gastric emptying and high serum leptin levels. *Gastroenterology*. 2015;1):S822.
19. Nobrega ACM, Ferreira BRS, Oliveira GJ, Sales KMO, Santos AA, Nobre e Souza MT, et al. Dyspeptic symptoms and delayed gastric emptying of solids in patients with inactive Crohn's disease. *BMC Gastroenterol*. 2012;12 (no pagination)(175).
20. Gourcerol G, Leblanc I, Leroi AM, Denis P, Ducrotte P. Gastric electrical stimulation in medically refractory nausea and vomiting. *Eur J Gastroenterol Hepatol*. 2007;19(1):29-35.
21. Kindt S, Coulie B, Wajs E, Janssens J, Tack J. Reproducibility and symptomatic predictors of a slow nutrient drinking test in health and in functional dyspepsia. *Neurogastroenterology and Motility*. 2008;20(4):320-9.
22. Mori H, Suzuki H, Matsuzaki J, Taniguchi K, Shimizu T, Yamane T, et al. Gender Difference of Gastric Emptying in Healthy Volunteers and Patients with Functional Dyspepsia. *Digestion*. 2017;95(1):72-8.
23. Kindt S, Van Oudenhove L, Mispelon L, Caenepeel P, Arts J, Tack J. Longitudinal and cross-sectional factors associated with long-term clinical course in functional dyspepsia: a 5-year follow-up study. *Am J Gastroenterol*. 2011;106(2):340-8.
24. Clauwaert N, Jones MP, Holvoet L, Vandenberghe J, Vos R, Tack J, et al. Associations between gastric sensorimotor function, depression, somatization, and symptom-based subgroups in functional gastroduodenal disorders: are all symptoms equal? *Neurogastroenterol Motil*. 2012;24(12):1088-e565.
25. Talley NJ, Verlinden M, Jones M. Can symptoms discriminate among those with delayed or normal gastric emptying in dysmotility-like dyspepsia? *The American journal of gastroenterology*. 2001;96(5):1422.
26. Pathikonda M, Sachdeva P, Malhotra N, Fisher RS, Maurer AH, Parkman HP. Gastric emptying scintigraphy: is four hours necessary? *J Clin Gastroenterol*. 2012;46(3):209-15.
27. Park SY, Acosta A, Camilleri M, Burton D, Harmsen WS, Fox J, et al. Gastric Motor Dysfunction in Patients With Functional Gastroduodenal Symptoms. *Am J Gastroenterol*. 2017.
28. Talley NJ, Locke GR, Lahr B, Zinsmeister AR, Tougas G, Ligozio G, et al. Functional dyspepsia, delayed gastric emptying, and impaired quality of life. *Gut*. 2006;55(7):933-9.
29. Sachdeva P, Malhotra N, Pathikonda M, Khayyam U, Fisher RS, Maurer AH, et al. Gastric emptying of solids and liquids for evaluation for gastroparesis. *Digestive Diseases and Sciences*. 2011;56(4):1138-46.
30. Khayyam U, Sachdeva P, Gomez J, Ramzan Z, Smith MS, Maurer AH, et al. Assessment of symptoms during gastric emptying scintigraphy to correlate symptoms to delayed gastric emptying. *Neurogastroenterol Motil*. 2010;22(5):539-45.
31. Stanghellini V, Tosetti C, Paternico A, Barbara G, Morselli-Labate AM, Monetti N, et al. Risk indicators of delayed gastric emptying of solids in patients with functional dyspepsia. *Gastroenterology*. 1996;110(4):1036-42.
32. Stanghellini V, Tosetti C, Horowitz M, De Giorgio R, Barbara G, Cogliandro R, et al. Predictors of gastroparesis in out-patients with secondary and idiopathic upper gastrointestinal symptoms. *Dig Liver Dis*. 2003;35(6):389-96.
33. Musaib-Ali L, Rolshud D, Ziessman HA, Estrella MM, Mullin GE, Jodorkovsky D, et al. Do symptoms predict delayed gastric emptying as measured by solid or liquid gastric scintigraphy in a symptomatic population with suspected gastroparesis? *Gastroenterology*. 2012;1):S846.
34. Halawi H, Camilleri M, Acosta A, Vazquez-Roque MI, Oduyebo I, Burton DD, et al. Relationship of Gastric Emptying or Accommodation with Satiation, Satiety and Postprandial Symptoms in Health. *Am J Physiol Gastrointest Liver Physiol*. 2017;ajpgi.00190.2017.

35. DiBaise JK, Patel N, Noeltling J, Dueck AC, Roarke M, Crowell MD. The relationship among gastroparetic symptoms, quality of life, and gastric emptying in patients referred for gastric emptying testing. *Neurogastroenterol Motil.* 2016;28(2):234-42.
36. Cassilly DW, Wang YR, Friedenberg FK, Nelson DB, Maurer AH, Parkman HP. Symptoms of gastroparesis: Use of the gastroparesis cardinal symptom index in symptomatic patients referred for gastric emptying scintigraphy. *Digestion.* 2008;78(2-3):144-51.
37. Boltin D, Zvidi I, Steinmetz A, Bernstine H, Groshar D, Nardi Y, et al. Vomiting and dysphagia predict delayed gastric emptying in diabetic and nondiabetic subjects. *Journal of Diabetes Research.* 2014;2014 294032.
38. Parkman HP, Yates KP, Maurer A, Hasler WL, Farrugia G, Grover M, et al. Gastric Emptying and Symptoms of Gastroparesis: Specific Symptoms Correlating to Severity of Gastric Retention. *Gastroenterology.* 2017;152(5):S933.
39. Stanghellini V, Tosetti C, Barbara G, De Giorgio R, Cogliandro L, Cogliandro R, et al. Dyspeptic symptoms and gastric emptying in the irritable bowel syndrome. *Am J Gastroenterol.* 2002;97(11):2738-43.
40. Olausson EA, Brock C, Drewes AM, Grundin H, Isaksson M, Stotzer P, et al. Measurement of gastric emptying by radiopaque markers in patients with diabetes: correlation with scintigraphy and upper gastrointestinal symptoms. *Neurogastroenterol Motil.* 2013;25(3):e224-32.
41. Jones KL, Russo A, Stevens JE, Wishart JM, Berry MK, Horowitz M. Predictors of delayed gastric emptying in diabetes. *Diabetes care.* 2001;24(7):1264-9.
42. Horowitz M, Maddox AF, Wishart JM, Harding PE, Chatterton BE, Shearman DJ. Relationships between oesophageal transit and solid and liquid gastric emptying in diabetes mellitus. *European journal of nuclear medicine.* 1991;18(4):229-34.
43. Gonlachanvit S, Maurer AH, Fisher RS, Parkman HP. Regional gastric emptying abnormalities in functional dyspepsia and gastro-oesophageal reflux disease. *Neurogastroenterol Motil.* 2006;18(10):894-904.
44. Olausson EA, Grundin H, Isaksson M, Brock C, Drewes AM, Attvall S, et al. Postprandial plasma glucose response and gastrointestinal symptom severity in patients with diabetic gastroparesis. *J Diabetes Sci Technol.* 2014;8(4):881-8.
45. Hellstrom PM, Degerblad M. Gastroparesis recognized by the gastroparesis cardinal symptom index (GCSI) assessment, dominating symptom and metabolic control in diabetes and idiopathic gastroparesis. *United European Gastroenterology Journal.* 2013;1):A435.
46. Kalkan C, Soydal C, Ozkan E, Maden A, Soykan I. Relationships between autonomic nerve function and gastric emptying in patients with autoimmune gastritis. *Clin Auton Res.* 2016;26(3):189-96.
47. Tseng PH, Wu YW, Lee YC, Cheng MF, Tzen KY, Wang HP, et al. Normal values and symptom correlation of a simplified oatmeal-based gastric emptying study in the Chinese population. *Journal of Gastroenterology and Hepatology (Australia).* 2014;29(11):1873-82.
48. Grad S, Poanta L, Dumitrascu DL, Dragoteanu M, Porojan M. Correlation between symptoms of diabetic gastroparesis and results of gastric scintigraphy. *Central European Journal of Medicine.* 2012;7(1):20-4.
49. Cuomo R, Sarnelli G, Grasso R, Bruzzese D, Pumpo R, Salomone M, et al. Functional dyspepsia symptoms, gastric emptying and satiety provocative test: analysis of relationships. *Scand J Gastroenterol.* 2001;36(10):1030-6.
50. HOROWITZ M, HARDING PE, MADDOX A, MADDERN GJ, COLLINS PJ, CHATTERTON BE, et al. Gastric and oesophageal emptying in insulin-dependent diabetes mellitus. *Journal of Gastroenterology and Hepatology.* 1986;1(2):97-113.
51. Faraj J, Melander O, Sundkvist G, Olsson R, Thorsson O, Ekberg O, et al. Oesophageal dysmotility, delayed gastric emptying and gastrointestinal symptoms in patients with diabetes mellitus. *Diabet Med.* 2007;24(11):1235-9.



52. Kawamura E, Enomoto M, Kotani K, Hagihara A, Fujii H, Kobayashi S, et al. Effect of mosapride citrate on gastric emptying in interferon-induced gastroparesis. *Dig Dis Sci.* 2012;57(6):1510-6.
53. Nowak TV, Johnson CP, Kalbfleisch JH, Roza AM, Wood CM, Weisbruch JP, et al. Highly variable gastric emptying in patients with insulin dependent diabetes mellitus. *Gut.* 1995;37(1):23-9.
54. van Wijk HJ, Smout AJ, Akkermans LM, Roelofs JM, ten Thije OJ. Gastric emptying and dyspeptic symptoms in the irritable bowel syndrome. *Scand J Gastroenterol.* 1992;27(2):99-102.
55. Jones K, Horowitz M, Carney B, Wishart J. Gastric emptying in early noninsulin-dependent diabetes mellitus. *The Journal of Nuclear Medicine.* 1996;37(10):1643.
56. Horowitz M, Harding PE, Maddox AF, Wishart JM, Akkermans LM, Chatterton BE, et al. Gastric and oesophageal emptying in patients with type 2 (non-insulin-dependent) diabetes mellitus. *Diabetologia.* 1989;32(3):151-9.
57. Trahair LG, Kimber TE, Flabouris K, Horowitz M, Jones KL. Gastric emptying, postprandial blood pressure, glycaemia and splanchnic flow in Parkinson's disease. *World J Gastroenterol.* 2016;22(20):4860-7.
58. Punkkinen J, Farkkila M, Matzke S, Korppi-Tommola T, Sane T, Piirila P, et al. Upper abdominal symptoms in patients with Type 1 diabetes: unrelated to impairment in gastric emptying caused by autonomic neuropathy. *Diabet Med.* 2008;25(5):570-7.
59. Talley NJ, Shuter B, McCrudden G, Jones M, Hoschl R, Piper DW. Lack of association between gastric emptying of solids and symptoms in nonulcer dyspepsia. *J Clin Gastroenterol.* 1989;11(6):625-30.
60. Wegener M, Borsch G, Schaffstein J, Reuter C, Leverkus F. Frequency of idiopathic gastric stasis and intestinal transit disorders in essential dyspepsia. *J Clin Gastroenterol.* 1989;11(2):163-8.
61. Waldron B, Cullen PT, Kumar R, Smith D, Jankowski J, Hopwood D, et al. Evidence for hypomotility in non-ulcer dyspepsia: a prospective multifactorial study. *Gut.* 1991;32(3):246-51.
62. Yu YH, Jo Y, Jung JY, Kim BK, Seok JW. Gastric emptying in migraine: a comparison with functional dyspepsia. *J Neurogastroenterol Motil.* 2012;18(4):412-8.
63. Lawal A, Barboi A, Krasnow A, Hellman R, Jaradeh S, Massey BT. Rapid gastric emptying is more common than gastroparesis in patients with autonomic dysfunction. *Am J Gastroenterol.* 2007;102(3):618-23.
64. Christensen CJ, Johnson WD, Abell TL. Patients with cyclic vomiting pattern and diabetic gastropathy have more migraines, abnormal electrogastragrams, and gastric emptying. *Scand J Gastroenterol.* 2008;43(9):1076-81.
65. Anaparthi R, Pehlivanov N, Grady J, Yimei H, Pasricha PJ. Gastroparesis and gastroparesis-like syndrome: Response to therapy and its predictors. *Digestive Diseases and Sciences.* 2009;54(5):1003-10.
66. Gustafsson RJ, Littorin B, Berntorp K, Frid A, Thorsson O, Olsson R, et al. Esophageal dysmotility is more common than gastroparesis in diabetes mellitus and is associated with retinopathy. *Review of Diabetic Studies.* 2011;8(2):268-75.
67. Guo WJ, Yao SK, Zhang YL, Yan J, Yin LJ, Li HL. Relationship between symptoms and gastric emptying of solids in functional dyspepsia. *J Int Med Res.* 2012;40(5):1725-34.
68. Bharucha AE, Camilleri M, Forstrom LA, Zinsmeister AR. Relationship between clinical features and gastric emptying disturbances in diabetes mellitus. *Clinical endocrinology.* 2009;70(3):415-20.
69. Anudeep V, Vinod KV, Pandit N, Sharma VK, Dhanapathi H, Dutta TK, et al. Prevalence and predictors of delayed gastric emptying among Indian patients with long-standing type 2 diabetes mellitus. *Indian J Gastroenterol.* 2016;35(5):385-92.
70. Bredenoord AJ, Chial HJ, Camilleri M, Mullan BP, Murray JA. Gastric accommodation and emptying in evaluation of patients with upper gastrointestinal symptoms. *Clin Gastroenterol Hepatol.* 2003;1(4):264-72.

71. Lee MW, Izzy M, Platovsky A, Chun K, Ma HY, Heo M, et al. Gastric emptying parameters in symptomatic patients with suspected gastroparesis: Are current diagnostic thresholds valid and can symptoms predict study outcome? *Am J Gastroenterol.* 2015;110:S1018.
72. Pasricha PJ, Yates KP, Nguyen L, Clarke J, Abell TL, Farrugia G, et al. Outcomes and Factors Associated with Reduced Symptoms in Patients with Gastroparesis. *Gastroenterology.* 2015;149(7):1762-74e4.
73. Hyett B, Martinez FJ, Gill BM, Mehra S, Lembo A, Kelly CP, et al. Delayed radionucleotide gastric emptying studies predict morbidity in diabetics with symptoms of gastroparesis. *Gastroenterology.* 2009;137(2):445-52.
74. Pasricha PJ, Colvin R, Yates K, Hasler WL, Abell TL, Unalp-Arida A, et al. Characteristics of Patients With Chronic Unexplained Nausea and Vomiting and Normal Gastric Emptying. *Clinical Gastroenterology and Hepatology.* 2011;9(7):567-76.
75. Ardila-Hani A, Arabyan M, Waxman A, Ih G, Berel D, Pimentel M, et al. Severity of dyspeptic symptoms correlates with delayed and early variables of gastric emptying. *Dig Dis Sci.* 2013;58(2):478-87.
76. Parkman HP, Yates K, Hasler WL, Nguyen L, Pasricha PJ, Snape WJ, et al. Clinical features of idiopathic gastroparesis vary with sex, body mass, symptom onset, delay in gastric emptying, and gastroparesis severity. *Gastroenterology.* 2011;140(1):101-15. e10.
77. Parkman HP, Hallinan EK, Hasler WL, Farrugia G, Koch KL, Nguyen L, et al. Early satiety and postprandial fullness in gastroparesis correlate with gastroparesis severity, gastric emptying, and water load testing. *Neurogastroenterology and Motility.* 2017;29 (4):e12981.
78. Koch KL, Hasler WL, Parkman HP, Van Natta ML, Abell TL, McCallum RW, et al. Correlations of liquid nutrient meal-induced symptoms with satiety test volumes in idiopathic gastroparesis: Relation to gastric emptying and myoelectric activity. *Gastroenterology.* 2014;1):S-608.
79. Borges CM, Secaf M, Troncon LE. Clinical features and severity of gastric emptying delay in Brazilian patients with gastroparesis. *Arquivos de gastroenterologia.* 2013;50(4):270-6.
80. Modiri AN, Kowalczyk M, Parkman HP. Headaches in gastroparesis: Headache severity correlates with gastroparesis symptoms severity. *Gastroenterology.* 2012;1):S551.
81. Jaffe JK, Paladugu S, Gaughan JP, Parkman HP. Characteristics of nausea and its effects on quality of life in diabetic and idiopathic gastroparesis. *J Clin Gastroenterol.* 2011;45(4):317-21.
82. Cherian D, Sachdeva P, Fisher RS, Parkman HP. Abdominal pain is a frequent symptom of gastroparesis. *Clinical Gastroenterology and Hepatology.* 2010;8(8):676-81.
83. McCallum RW, Cynshi O, Investigative T. Clinical trial: effect of mitemcinal (a motilin agonist) on gastric emptying in patients with gastroparesis - a randomized, multicentre, placebo-controlled study. *Aliment Pharmacol Ther.* 2007;26(8):1121-30.
84. Parkman HP, Hallinan EK, Hasler WL, Farrugia G, Koch KL, Calles J, et al. Nausea and vomiting in gastroparesis: similarities and differences in idiopathic and diabetic gastroparesis. *Neurogastroenterology and Motility.* 2016;28(12):1902-14.
85. Hassam A, Arasu S, Malik ZA, Maurer AH, Parkman HP. Symptoms following meal ingestion during gastric emptying scintigraphy in patients with gastroparesis. *Gastroenterology.* 2014;1):S-611.
86. Kowalczyk M, Friedenberg F, Cherian D, Parkman H. Influence of race on symptoms and quality of life in Gastroparesis. *Am J Gastroenterol.* 2011;106:S498-S9.
87. Hasler WL, Wilson LA, Parkman HP, Nguyen L, Abell TL, Koch KL, et al. Bloating in gastroparesis: Severity, impact, and associated factors. *Am J Gastroenterol.* 2011;106(8):1492-502.
88. Hasler WL, Wilson LA, Parkman HP, Koch KL, Abell TL, Nguyen L, et al. Factors related to abdominal pain in gastroparesis: Contrast to patients with predominant nausea and vomiting. *Neurogastroenterology and Motility.* 2013;25(5):427-e301.

89. Karamanolis G, Caenepeel P, Arts J, Tack J. Determinants of symptom pattern in idiopathic severely delayed gastric emptying: Gastric emptying rate or proximal stomach dysfunction? *Gut*. 2007;56(1):29-36.
90. Butt S, Leung RS, Batla A, Bhatia K, Raeburn AJ, Zarate N, et al. Dysmotility in parkinson's disease correlates to gut symptoms: Findings of a wireless motility capsule study. *Gastroenterology*. 2014;1):S-357.
91. Barshop K, Staller K, Semler J, Kuo B. Duodenal rather than antral motility contractile parameters correlate with symptom severity in gastroparesis patients. *Neurogastroenterol Motil*. 2015;27(3):339-46.
